# Supplementary material for: Quantitative Proteomic and Interaction Network Analysis of Cisplatin Resistance in HeLa Cells
Source: PubMed Central journal article supplement (PMC3102677; doi:10.1371/journal.pone.0019892), 2011-05-26

1 2 3 4 5 6 7 8 9 10 11 12

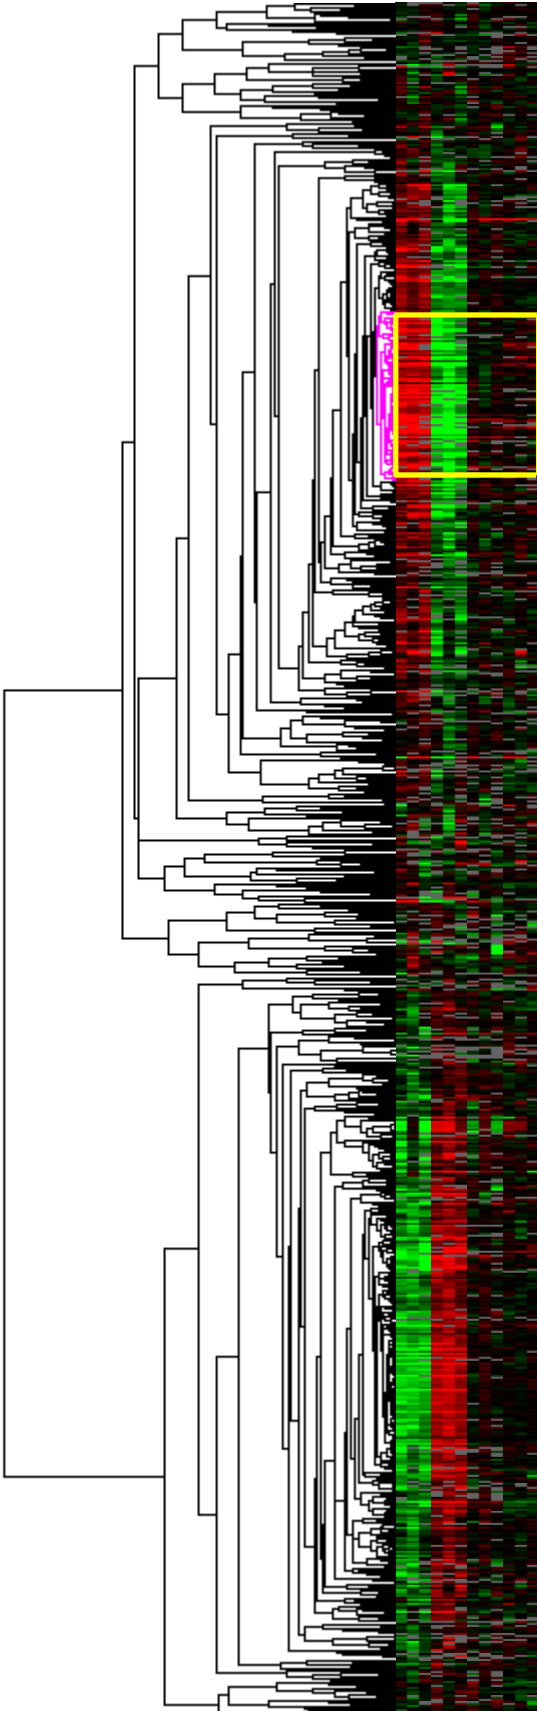

1 2 3 4 5 6 7 8 9 10 11 12

### Protein ID

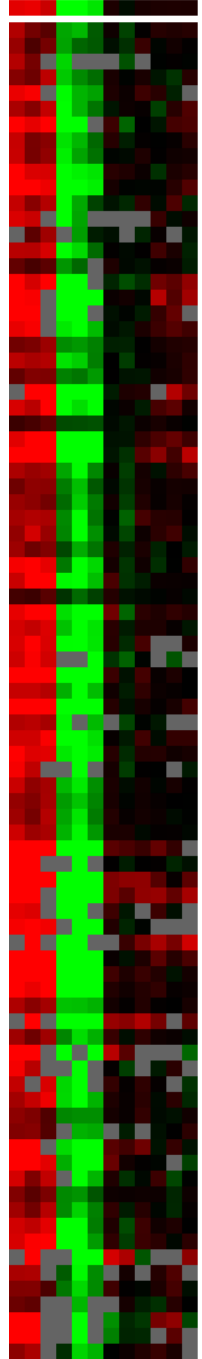

ANXA2 HUMAN  
ANXA1 HUMAN  
ATD3C HUMAN  
COX41 HUMAN  
PICAL HUMAN  
K6PP HUMAN  
CRPG HUMAN  
PDI3 HUMAN  
KPYM HUMAN  
BIEA HUMAN  
ZCCHV HUMAN  
ARP3 HUMAN  
ERP29 HUMAN  
PSD12 HUMAN  
GSTO1 HUMAN  
SEPT2 HUMAN  
CD44 HUMAN  
GSTK1 HUMAN  
CSRFP1 HUMAN  
COTL1 HUMAN  
LDHA HUMAN  
PP1B HUMAN  
HDEB HUMAN  
KIDU HUMAN  
PRDX5 HUMAN  
HDKA HUMAN  
RPN2 HUMAN  
S100P HUMAN  
CALR HUMAN  
LDHB HUMAN  
ENO8 HUMAN  
ENO8 HUMAN  
TKT HUMAN  
GLU2B HUMAN  
PDI34 HUMAN  
ANXA6 HUMAN  
PPIA HUMAN  
LEG1 HUMAN  
FLNA HUMAN  
FKBP3 HUMAN  
AL7A1 HUMAN  
PDI11 HUMAN  
PLEC1 HUMAN  
CKAP4 HUMAN  
HCDH HUMAN  
PDI16 HUMAN  
ANXA5 HUMAN  
S100D HUMAN  
MOES HUMAN  
PGK1 HUMAN  
PUR9 HUMAN  
PGAM4 HUMAN  
APT HUMAN  
CHSP1 HUMAN  
G6PD HUMAN  
NOD1 HUMAN  
ASPH HUMAN  
DHAK HUMAN  
S100A HUMAN  
S100B HUMAN  
6PGD HUMAN  
TALDO HUMAN  
PGAM1 HUMAN  
S27A2 HUMAN  
GANAB HUMAN  
IDHP HUMAN  
IL18 HUMAN  
RCL HUMAN  
PRDX4 HUMAN  
PRDX6 HUMAN  
RAB1A HUMAN  
HSBP1 HUMAN  
PIR HUMAN  
BLVRB HUMAN  
THUM2 HUMAN  
PARK7 HUMAN  
PSA HUMAN  
S1006 HUMAN  
IC05 HUMAN  
HT3D1 HUMAN  
GDIR1 HUMAN  
SEC13 HUMAN  
CRTD HUMAN  
VRT1 HUMAN  
PLAK HUMAN

### Intensity Scale

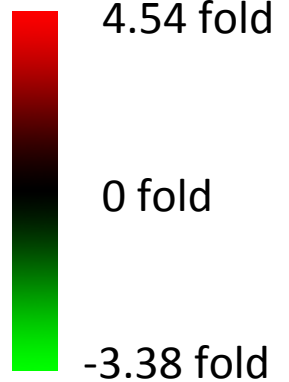

Supplement: pone.0019892.s001.pdf [file pone.0019892.s001.pdf]
