# Supplementary material for: Quantitative Proteomic and Interaction Network Analysis of Cisplatin Resistance in HeLa Cells
Source: PubMed Central journal article supplement (PMC3102677; doi:10.1371/journal.pone.0019892), 2011-05-26

# CD44

Std. HeLa HeLa/CDDP Std.  
1 2 3 4 5 6

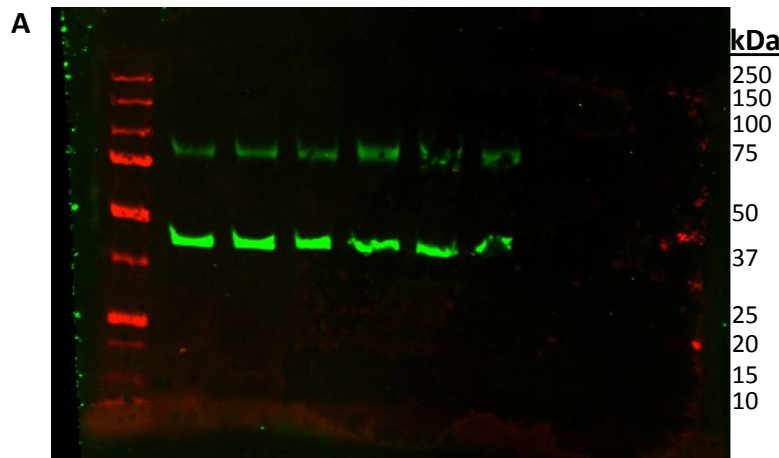

# DDB1

Std. HeLa HeLa/CDDP Std.  
1 2 3 4 5 6

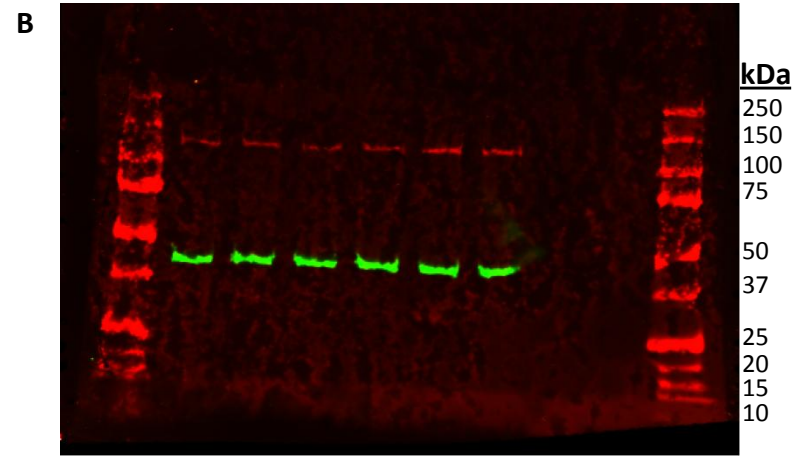

# DJ-1

Std. HeLa HeLa/CDDP Std.  
1 2 3 4 5 6

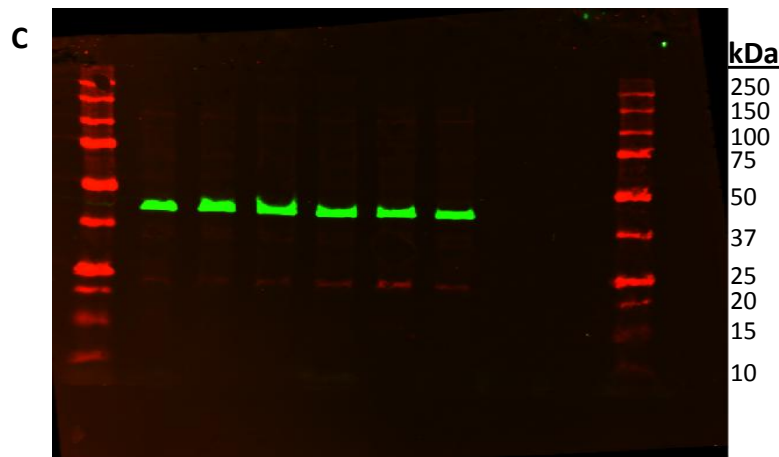

# XRCC5

Std. HeLa HeLa/CDDP Std.  
1 2 3 4 5 6

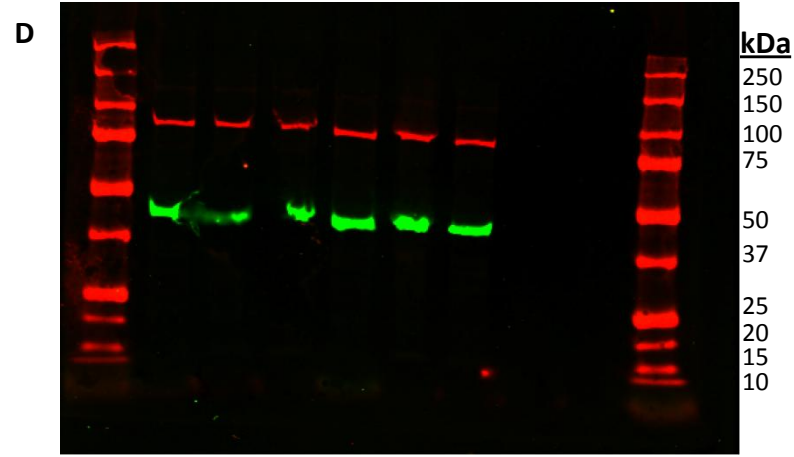

Supplement: pone.0019892.s002.pdf [file pone.0019892.s002.pdf]
