# Supplementary material for: Quantitative Proteomic and Interaction Network Analysis of Cisplatin Resistance in HeLa Cells
Source: PubMed Central journal article supplement (PMC3102677; doi:10.1371/journal.pone.0019892), 2011-05-26

# MaxQuant vs. SILACtor Distribution of Normalized RIA values

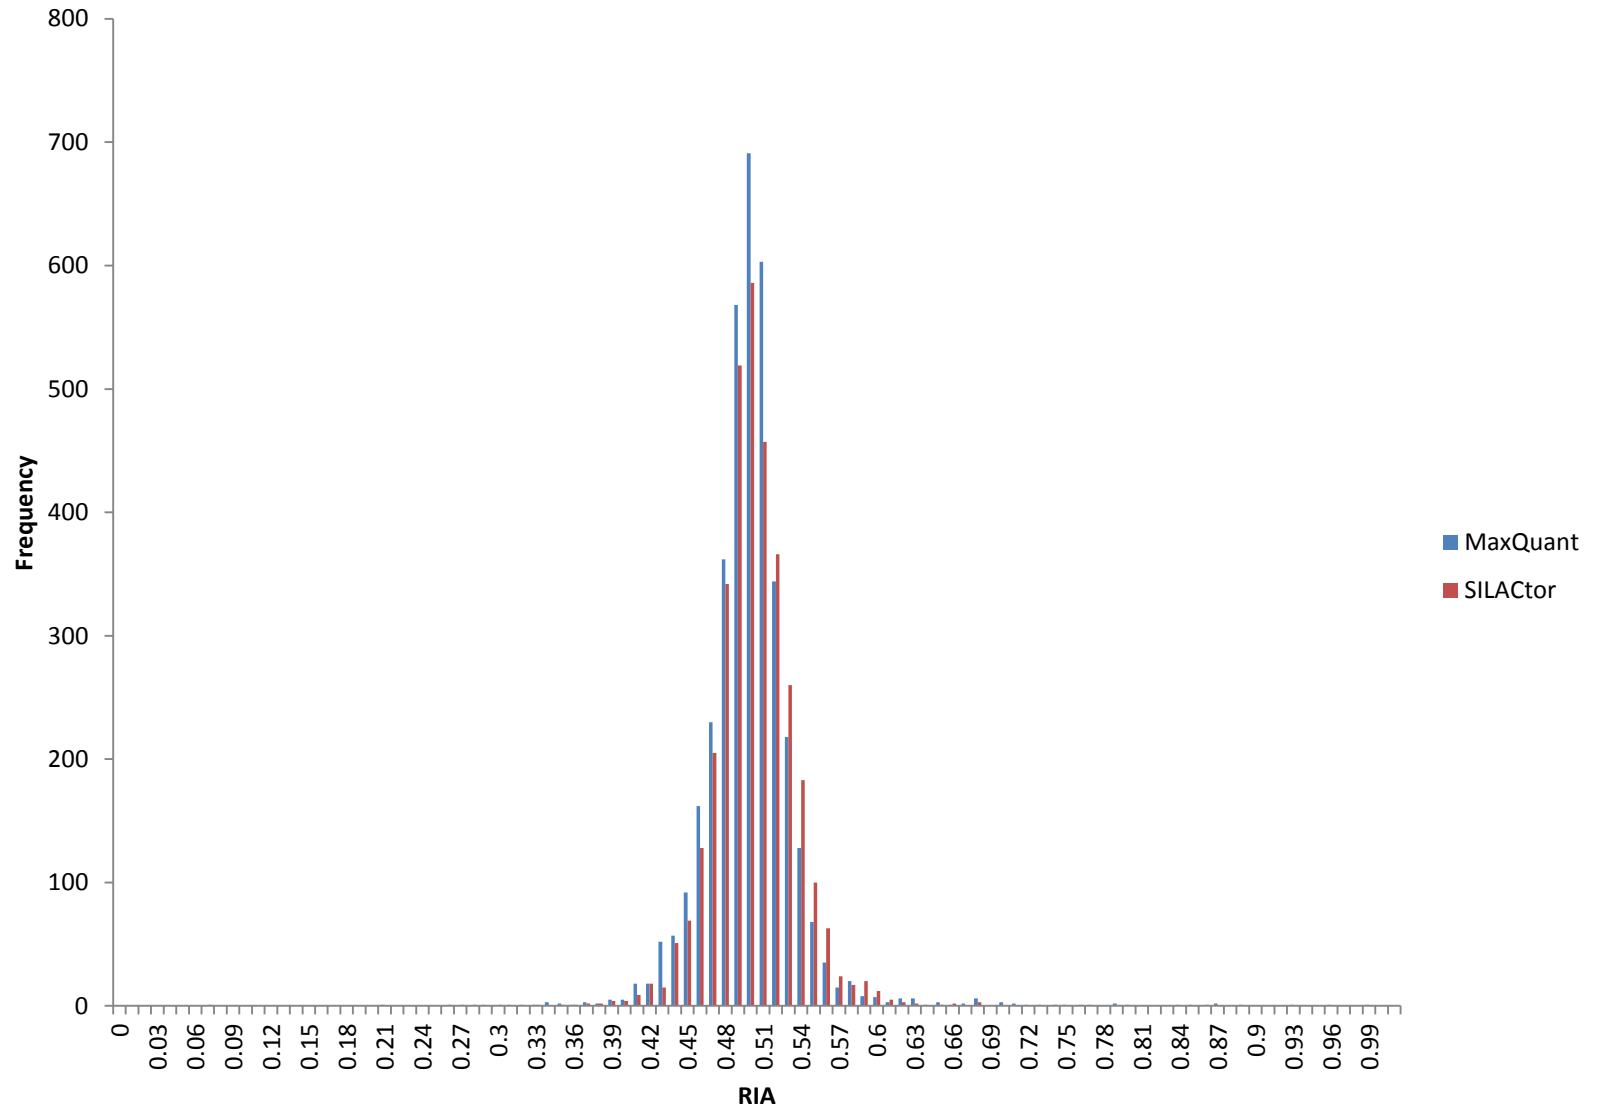

Supplement: pone.0019892.s003.pdf [file pone.0019892.s003.pdf]
